# Supplementary material for: Sex, Age, and Regional Disparities in the Burden of Asthma in Mexico from 1990 to 2019: A Secondary Analysis of the Global Burden of Disease Study 2019
Source: Preprints.org preprint supplement (doi:10.20944/preprints202306.1395.v1), 2023-06-21
Supplement: Supplementary file 1 [file supplementary]

# Supplementary Table 1. List of the 46 data input sources from Mexico used by the GBD to estimate the burden of asthma.

| **Title** | **Time period covered** | **Geography** | **Data type** | **Secondary data type** |
| --- | --- | --- | --- | --- |
| Association between obesity and asthma in preschool Mexican children | 01/2005 to 12/2005 | Mexico | Scientific literature |  |
| Asthma in late adolescents of Western Mexico: prevalence and associated factors | 01/2009 to 12/2009 | Mexico | Scientific literature |  |
| Global variation in the prevalence and severity of asthma symptoms: phase three of the International Study of Asthma and Allergies in Childhood (ISAAC) | 01/2000 to 12/2003 | Global | Scientific literature |  |
| Association between obesity and asthma in preschool Mexican children | 01/2005 to 12/2005 | Mexico | Scientific literature |  |
| Asthma in late adolescents of Western Mexico: prevalence and associated factors | 01/2009 to 12/2009 | Mexico | Scientific literature |  |
| Global variation in the prevalence and severity of asthma symptoms: phase three of the International Study of Asthma and Allergies in Childhood (ISAAC) | 01/2000 to 12/2003 | Global | Scientific literature |  |
| Mexico - Mexico City Survey on Health, Well-Being, and Aging in Latin America and the Caribbean 1999-2000 | 10/1999 to 12/2000 | Mexico, Distrito Federal | Survey | Household |
| Mexico Family Life Survey 2002 | 01/2002 to 12/2002 | Mexico | Survey | Nationally and Subnationally representative |
| Mexico Family Life Survey 2005-2006 | 01/2005 to 12/2006 | Mexico | Survey | Nationally and Subnationally representative |
| Mexico Family Life Survey 2008-2013 | 11/2008 to 10/2013 | Mexico | Survey | Nationally and Subnationally representative |
| Mexico Health and Aging Study 2012 | 10/2012 to 11/2012 | Mexico | Survey | Nationally and Subnationally representative |
| Mexico Household Income and Expenditure Survey 2002 | 08/2002 to 11/2002 | Mexico | Survey | Nationally and Subnationally representative |
| Mexico Morbidity Yearbook 2012 | 01/2012 to 12/2012 | Mexico | Epi surveillance | Subnationally representative |
| Mexico Morbidity Yearbook 2013 | 01/2013 to 12/2013 | Mexico | Epi surveillance | Subnationally representative |
| Mexico Morbidity Yearbook 2014 | 01/2014 to 12/2014 | Mexico | Epi surveillance | Subnationally representative |
| Mexico National Health Survey 1994 | 01/1994 to 12/1994 | Mexico | Survey | Cross-sectional, Household, Individual, Interview |
| Mexico National Health Survey 1999-2000 | 09/1999 to 03/2000 | Mexico | Survey | Nationally and Subnationally representative |
| Mexico National Nutrition Survey 1998-1999 | 10/1998 to 03/1999 | Mexico | Survey | Nationally representative, Urban-rural representative |
| Mexico National Performance Evaluation Survey 2002-2003 | 11/2002 to 04/2003 | Mexico | Survey | Nationally and Subnationally representative |
| Mexico National School Health Survey 2008 | 09/2007 to 06/2008 | Mexico | Survey | Nationally and Subnationally representative |
| Mexico National Survey of Health and Nutrition (ENSANUT) 2018-2019 | 07/2018 to 06/2019 | Mexico | Survey | Nationally and Subnationally representative |
| Mexico National Survey of Health and Nutrition 2005-2006 | 10/2005 to 05/2006 | Mexico | Survey | Household, Subnationally representative |
| Mexico National Survey of Health and Nutrition 2011-2012 | 06/2011 to 12/2012 | Mexico | Survey | Nationally and Subnationally representative |
| Mexico Salud Mesoam√©rica Initiative Baseline Census and Household Survey 2013 | 01/2013 to 06/2013 | Mexico, Chiapas | Survey | Cross-sectional, Household, Individual, Interview |
| Mexico Secretariat of Health Hospital Discharges 2011 | 01/2011 to 12/2011 | Mexico | Administrative data | Discharge, Inpatient, Subnationally representative |
| Mexico Secretariat of Health Hospital Discharges 2014 | 01/2014 to 12/2014 | Mexico | Administrative data | Discharge, Inpatient, Subnationally representative |
| Mexico SUIVE Epidemiology Bulletin Week 1, 2017 - No. 1 Vol. 34 | 01/2010 to 01/2017 | Mexico | Epi surveillance | Subnationally representative |
| Mexico SUIVE Epidemiology Bulletin Week 2, 2017 - No. 2, Vol. 34 | 01/1981 to 01/2017 | Mexico | Epi surveillance | Subnationally representative |
| Mexico SUIVE Epidemiology Bulletin Week 52 1995 | 01/1995 to 12/1995 | Mexico | Epi surveillance | Subnationally representative |
| Mexico SUIVE Epidemiology Bulletin Week 52 1996 | 01/1996 to 12/1996 | Mexico | Epi surveillance | Subnationally representative |
| Mexico SUIVE Epidemiology Bulletin Week 53 1997 | 01/1997 to 12/1997 | Mexico | Epi surveillance | Subnationally representative |
| Mexico SUIVE Epidemiology Bulletin Week 52 1998 | 01/1998 to 12/1998 | Mexico | Epi surveillance | Subnationally representative |
| Mexico SUIVE Epidemiology Bulletin Week 52 1999 | 01/1999 to 12/1999 | Mexico | Epi surveillance | Subnationally representative |
| Mexico SUIVE Epidemiology Bulletin Week 52 2000 | 01/2000 to 12/2000 | Mexico | Epi surveillance | Subnationally representative |
| Mexico SUIVE Epidemiology Bulletin Week 52 2013 | 01/2013 to 12/2013 | Mexico | Epi surveillance | Subnationally representative |
| Mexico SUIVE Epidemiology Bulletin Week 53, 2014 | 01/2014 to 12/2014 | Mexico | Epi surveillance | Subnationally representative |
| Mexico SUIVE Epidemiology Bulletin Week 52, 2015 | 01/2015 to 12/2015 | Mexico | Epi surveillance | Subnationally representative |
| Mexico SUIVE Epidemiology Bulletin Week 52, 2016 | 01/2016 to 12/2016 | Mexico | Epi surveillance | Subnationally representative |
| Mexico SUIVE Epidemiology Weekly Bulletin 2017 | 01/2016 to 12/2017 | Mexico | Epi surveillance | Subnationally representative |
| Mexico SUIVE Epidemiology Weekly Bulletin 2018 | 01/2009 to 12/2018 | Mexico | Epi surveillance | Subnationally representative |
| Mexico SUIVE Epidemiology Weekly Bulletin 2019 | 01/2013 to 12/2019 | Mexico | Epi surveillance | Subnationally representative |
| Mexico SUIVE Epidemiology Weekly Bulletin 2020 | 01/2015 to 12/2020 | Mexico | Epi surveillance | Subnationally representative |
| Mexico WHO Study on Global AGEing and Adult Health 2009-2010 | 01/2009 to 12/2010 | Mexico | Survey | Nationally and Subnationally representative |
| Mexico World Health Survey 2002-2003 | 11/2002 to 08/2003 | Mexico | Survey | Household, Individual, |
| Premise General Population COVID-19 Health Services Disruption Survey 2020 | 2020-07-01 | Global | Survey | Cross-sectional, Individual |
| Premise General Population COVID-19 Health Services Disruption Survey 2020 | 2020-07-01 | Global | Survey | Cross-sectional, Individual |
| Premise General Population COVID-19 Health Services Disruption Survey 2021 | 05/2021 to 06/2021 | Global | Survey | Cross-sectional, Individual |
| Regional variation in asthma symptom prevalence in Latin American children | 01/2001 to 12/2003 | The Americas | Scientific literature |  |
| Worldwide variations in the prevalence of asthma symptoms: the International Study of Asthma and Allergies in Childhood (ISAAC) | 01/1986 to 12/1996 | Global | Scientific literature |  |
| Mexico Vital Registration – Deaths | 1980 to 2017 | Mexico | Survey | Nationally and Subnationally representative |

# Supplementary Table 2. Health state and disability weights defined by the GBD (1).

| **Asthma severity (% of total, 95% uncertainty interval)** | **Health state definition** | **Disability weight** |
| --- | --- | --- |
| Asymptomatic (36.2, 35.0 to 37.3) |  |  |
| Controlled (19.9, 13.6 to 27.8) | A person that experiences cough and wheezing once a month but without interfering with daily activities | 0.015 (0.007 to 0.026) |
| Partially controlled (20.6, 15.1 to 25.8) | A person that experiences cough and wheezing once a week and has some difficulty with daily activities | 0.036 (0.022 to 0.055) |
| Uncontrolled (23.3, 18.7 to 30.3) | A person that experiences cough, wheezing, and shortness of breath more than twice in a week, which causes difficulties with daily activities and wakes the person during the night | 0.133 (0.086 to 0.192) |

**Supplementary Table 3.** Estimates (counts with 95% UI) of prevalence, incidence, mortality and DALYs due to asthma in Mexico by age group in 2019.

| **Age group** | **Prevalence** | **Incidence** | **Mortality** | **DALYs** |
| --- | --- | --- | --- | --- |
| **1-4** | 428,338 (244,811 to 683,550) | 206,823 (120,919 to 326,983) | 34 (3 to 58) | 20,295 (11,571 to 34,442) |
| **5-9** | 723,419 (452,895 to 1,166,406) | 148,023 (74,191 to 265,416) | 7 (3 to 10) | 29,916 (16,275 to 52,729) |
| **10-14** | 564,805 (348,405 to 885,009) | 87,796 (39,137 to 143,312) | 10 (3 to 12) | 23,553 (13,027 to 40,110) |
| **15-19** | 367,593 (229,086 to 563,674) | 50,138 (28,679 to 78,080) | 12 (3 to 15) | 15,631 (8,716 to 25,976) |
| **20-24** | 223,506 (141,648 to 332,259) | 28,153 (11,868 to 50,964) | 18 (3 to 22) | 10,112 (5,817 to 16,235) |
| **25-29** | 173,735 (110,603 to 263,407) | 18,488 (10,470 to 28,699) | 22 (3 to 27) | 8,250 (5,053 to 13,138) |
| **30-34** | 160,316 (107,075 to 234,010) | 12,376 (5,794 to 21,027) | 26 (3 to 32) | 7,792 (5,023 to 11,712) |
| **35-39** | 143,634 (99,693 to 207,459) | 9,496 (4,844 to 16,329) | 33 (3 to 41) | 7,330 (4,955 to 10,802) |
| **40-44** | 122,755 (86,777 to 171,114) | 7,778 (3,396 to 14,545) | 47 (3 to 60) | 6,980 (4,827 to 9,691) |
| **45-49** | 104,242 (75,518 to 145,131) | 6,969 (3,106 a 12,614) | 58 (3 to 73) | 6,443 (4,565 to 8,807) |
| **50-54** | 83,814 (60,253 to 116,427) | 5,957 (2,754 to 10,007) | 70 (3 to 89) | 5,809 (4,276 to 7,834) |
| **55-59** | 66,838 (48,329 to 90,479) | 5,059 (2,233 to 8,980) | 86 (3 to 107) | 5,308 (4,069 to 6,927) |
| **60-64** | 53,765 (37,566 to 73,084) | 4,360 (2,149 to 7,378) | 107 (3 to 133) | 4,974 (3,842 to 6,340) |
| **65-69** | 40,283 (29,711 to 51,972) | 3,491 (1,564 to 6,589) | 127 (3 to 155) | 4,445 (3,568 to 5,491) |
| **70-74** | 32,533 (23,224 to 44,857) | 3,069 (1,493 to 5,399) | 164 (3 to 196) | 4,308 (3,501 to 5,205) |
| **75-79** | 24,479 (17,995 to 32,797) | 2,509 (1,333 to 4,077) | 196 (3 to 233) | 3,837 (3,141 to 4,558) |
| **80-84** | 17,684 (12,990 to 24,109) | 2,310 (1,466 to 3,545) | 221 (3 to 263) | 3,177 (2,571 to 3,752) |
| **85-89** | 12,477 (9,453 to 16,557) | 1,880 (1,302 to 2,602) | 208 (3 to 249) | 2,270 (1,791 to 2,691) |
| **90-94** | 6,585 (4,876 to 8,825) | 972 (586 to 1,430) | 136 (3 to 165) | 1,156 (887 to 1,387) |
| **>95** | 2,555 (1,726 to 3,666) | 354 (185 to 540) | 71 (3 to 87) | 455 (344 to 552) |

DALYs = Disability-adjusted lived years

**Supplementary Table 4.** Prevalence, incidence, mortality and DALYs rate (with 95% UI) due to asthma per 100,000 people in Mexico by age group in 2019.

| **Age group** | **Prevalence** | **Incidence** | **Mortality** | **DALYs** |
| --- | --- | --- | --- | --- |
| **1-4** | 5,102 (2,916 to 8,142) | 2,463 (1,440 to 3,895) | 0.41 (0.29 to 0.70) | 242 (138 to 410) |
| **5-9** | 6,687 (4,186 to 10,782) | 1,368 (686 to 2,453) | 0.07 (0.05 to 0.10) | 277 (150 to 487) |
| **10-14** | 5,133 (3,166 to 8,043) | 798 (356 to 1,302) | 0.09 (0.07 to 0.11) | 214 (118 to 365) |
| **15-19** | 3,363 (2,096 to 5,157) | 459 (262 to 714) | 0.11 (0.09 to 0.14) | 143 (80 to 238) |
| **20-24** | 2,089 (1,324 to 3,105) | 263 (111 to 476) | 0.17 (0.13 to 0.21) | 94 (54 to 152) |
| **25-29** | 1,718 (1,094 to 2,605) | 183 (104 to 284) | 0.22 (0.17 to 0.27) | 82 (50 to 130) |
| **30-34** | 1,686 (1,126 to 2,461) | 130 (61 to 221) | 0.28 (0.21 to 0.34) | 82 (53 to 123) |
| **35-39** | 1,609 (1,116 to 2,323) | 106 (54 to 183) | 0.37 (0.28 to 0.46) | 82 (55 to 121) |
| **40-44** | 1,467 (1,037 to 2,045) | 93 (41 to 174) | 0.56 (0.43 to 0.71) | 83 (58 to 116) |
| **45-49** | 1,347 (976 to 1,875) | 90 (40 to 163) | 0.75 (0.58 to 0.94) | 83 (59 to 114) |
| **50-54** | 1,260 (906 to 1,751) | 90 (41 to 150) | 1.06 (0.81 to 1.34) | 87 (64 to 118) |
| **55-59** | 1,211 (876 to 1,639) | 92 (40 to 163) | 1.56 (1.18 to 1.93) | 96 (74 to 125) |
| **60-64** | 1,193 (834 to 1,622) | 97 (48 to 164) | 2.37 (1.84 to 2.95) | 110 (85 to 141) |
| **65-69** | 1,213 (895 to 1,565) | 105 (47 to 198) | 3.82 (2.95 to 4.67) | 134 (107 to 165) |
| **70-74** | 1,269 (906 to 1,749) | 120 (58 to 211) | 6.39 (5.07 to 7.65) | 168 (137 to 203) |
| **75-79** | 1,371 (1,008 to 1,837) | 141 (75 to 228) | 11.00 (8.79 to 13.03) | 215 (176 to 255) |
| **80-84** | 1,577 (1,159 to 2,150) | 206 (131 to 316) | 19.69 (15.71 to 23.46) | 283 (229 to 335) |
| **85-89** | 2,086 (1,581 to 2,769) | 314 (218 to 435) | 34.86 (26.86 to 41.72) | 380 (300 to 450) |
| **90-94** | 2,837 (2,101 to 3,803) | 419 (252 to 616) | 58.66 (43.35 to 71.03) | 498 (382 to 598) |
| **>95** | 3,723 (2,515 to 5,343) | 516 (270 to 786) | 103.75 (75.10 to 126.59) | 662 (501 to 804) |

DALYs = Disability-adjusted lived years

## Supplementary Table 5. Estimates (counts with 95% UI) of prevalence, incidence, mortality, and DALYs due to asthma in men and women of all ages at the subnational level in 2019.

| **State** | **Prevalence** | **Incidence** | **Mortality** | **DALYs** |
| --- | --- | --- | --- | --- |
| Aguascalientes | 39,552 (30,248 to 51,584) | 7,139 (5,105 to 9,709) | 13 (3 to 16) | 1,905 (1,292 to 2,815) |
| Baja California | 89,895 (66,494 to 124,590) | 16,171 (11,227 to 22,466) | 34 (3 to 43) | 4,475 (3,055 to 6,627) |
| Baja California Sur | 22,624 (17,598 to 29,638) | 3,923 (2,848 to 5,221) | 8 (3 to 10) | 1,097 (758 to 1,607) |
| Campeche | 26,738 (20,923 to 34,202) | 4,742 (3,440 to 6,369) | 16 (3 to 20) | 1,420 (1,024 to 2,015) |
| Chiapas | 182,534 (140,349 to 239,902) | 35,008 (25,085 to 47,363) | 90 (3 to 112) | 9,646 (6,871 to 13,861) |
| Chihuahua | 99,401 (78,083 to 127,597) | 17,438 (12,774 to 23,139) | 53 (3 to 65) | 5,296 (3,747 to 7,561) |
| Coahuila | 87,106 (67,647 to 114,809) | 15,703 (11,314 to 21,552) | 30 (3 to 38) | 4,175 (2,858 to 6,222) |
| Colima | 21,022 (16,609 to 26,933) | 3,622 (2,677 to 4,811) | 12 (3 to 16) | 1,120 (800 to 1,602) |
| Durango | 51,734 (40,242 to 67,383) | 9,502 (6,814 to 12,919) | 25 (3 to 31) | 2,651 (1,839 to 3,843) |
| Guanajuato | 180,201 (140,901 to 235,132) | 32,211 (23,419 to 43,874) | 95 (3 to 120) | 9,369 (6,696 to 13,497) |
| Guerrero | 109,944 (85,730 to 142,810) | 20,729 (14,952 to 28,419) | 59 (3 to 73) | 5,788 (4,091 to 8,251) |
| Hidalgo | 84,608 (65,886 to 109,624) | 15,197 (10,885 to 20,388) | 36 (3 to 44) | 4,206 (2,908 to 6,115) |
| Jalisco | 210,128 (159,098 to 277,945) | 38,074 (27,237 to 51,774) | 94 (3 to 114) | 10,639 (7,332 to 15,513) |
| Estado de México | 411,104 (306,297 to 565,103) | 78,148 (54,450 to 107,696) | 133 (3 to 161) | 19,865 (13,320 to 29,752) |
| Mexico City | 180,254 (135,839 to 242,480) | 31,548 (22,379 to 43,108) | 72 (3 to 92) | 8,711 (5,854 to 12,975) |
| Michoacán | 135,148 (105,064 to 175,809) | 24,406 (17,395 to 32,515) | 81 (3 to 102) | 7,169 (5,115 to 10,116) |
| Morelos | 50,616 (39,064 to 65,569) | 9,109 (6,470 to 12,249) | 27 (3 to 34) | 2,601 (1,814 to 3,776) |
| Nayarit | 35,118 (27,458 to 45,495) | 6,296 (4,537 to 8,383) | 21 (3 to 27) | 1,871 (1,320 to 2,667) |
| Nuevo Leon | 118,887 (87,905 to 163,375) | 21,674 (15,186 to 29,669) | 35 (3 to 44) | 5,521 (3,644 to 8,305) |
| Oaxaca | 118,404 (91,317 to 154,221) | 21,754 (15,621 to 29,205) | 67 (3 to 84) | 6,120 (4,327 to 8,763) |
| Puebla | 187,367 (144,627 to 244,713) | 34,375 (24,725 to 46,168) | 97 (3 to 121) | 9,711 (6,814 to 13,806) |
| Queretaro | 61,067 (47,352 to 79,671) | 10,962 (7,826 to 14,564) | 22 (3 to 28) | 2,976 (2,059 to 4,329) |
| Quintana Roo | 49,239 (38,517 to 63,102) | 8,666 (6,295 to 11,377) | 21 (3 to 26) | 2,490 (1,752 to 3,578) |
| San Luis Potosi | 79,398 (61,369 to 103,834) | 14,314 (10,307 to 19,425) | 40 (3 to 50) | 4,009 (2,790 to 5,832) |
| Sinaloa | 83,040 (65,246 to 106,742) | 14,462 (10,566 to 19,396) | 48 (3 to 60) | 4,366 (3,112 to 6,180) |
| Sonora | 82,365 (64,011 to 106,114) | 14,393 (10,439 to 19,255) | 36 (3 to 44) | 4,126 (2,888 to 6,011) |
| Tabasco | 70,217 (54,283 to 91,172) | 12,465 (9,062 to 16,707) | 45 (3 to 57) | 3,890 (2,801 to 5,479) |
| Tamaulipas | 100,191 (78,468 to 129,739) | 17,482 (12,640 to 23,248) | 35 (3 to 43) | 4,790 (3,266 to 7,044) |
| Tlaxcala | 37,227 (28,405 to 48,861) | 6,726 (4,805 to 8,981) | 9 (3 to 11) | 1,689 (1,117 to 2,508) |
| Veracruz | 242,689 (191,544 to 302,969) | 41,124 (30,732 to 53,940) | 230 (3 to 284) | 14,658 (10,873 to 19,680) |
| Yucatan | 59,166 (46,348 to 75,655) | 10,246 (7,479 to 13,525) | 45 (3 to 57) | 3,257 (2,340 to 4,567) |
| Zacatecas | 46,372 (36,446 to 58,920) | 8,392 (6,030 to 11,228) | 28 (3 to 34) | 2,434 (1,717 to 3,465) |

DALYs = Disability-adjusted lived years

# Supplementary Table 6. Percent change from 2010 to 2019 in estimates of prevalence, incidence, mortality, and DALYs due to asthma at the subnational level.

| **State** | **% change from 2010 to 2019 (95% UI)** | | | |
| --- | --- | --- | --- | --- |
| Prevalence | Incidence | Mortality | DALYs |
| Aguascalientes | 22.48 (14.60 to 30.37) | 18.29 (8.34 to 25.99) | 0.13 (-19.20 to 22.87) | 15.66 (6.55 to 24.42) |
| Baja California | 23.56 (14.17 to 34.61) | 19.79 (10.52 to 29.19) | 8.20 (-13.28 to 32.22) | 15.42 (3.48 to 26.50) |
| Baja California Sur | 40.23 (30.79 to 49.22) | 33.74 (25.68 to 42.05) | 38.47 (2.53 to 77.63) | 40.02 (29.55 to 52.22) |
| Campeche | 18.05 (11.19 to 25.66) | 15.73 (8.20 to 23.36) | 11.50 (-10.44 to 36.98) | 14.19 (5.42 to 23.75) |
| Chiapas | 25.61 (16.76 to 35.38) | 25.00 (16.29 to 34.42) | 1.25 (-19.47 to 26.59) | 15.97 (5.69 to 27.18) |
| Chihuahua | 9.44 (2.40 to 16.68) | 5.89 (-1.37 to 12.45) | -0.01 (-21.03 to 21.82) | 4.53 (-4.21 to 13.03) |
| Coahuila | 23.17 (15.35 to 31.87) | 20.59 (12.82 to 29.92) | 3.84 (-16.39 to 26.41) | 18.03 (8.50 to 27.41) |
| Colima | 21.50 (13.64 to 30.11) | 16.77 (7.78 to 24.34) | 22.62 (-8.25 to 58.62) | 20.35 (9.85 to 32.36) |
| Durango | 13.13 (5.76 to 20.97) | 10.77 (2.63 to 19.07) | -11.28 (-28.40 to 9.70) | 4.68 (-4.07 to 13.41) |
| Guanajuato | 14.78 (8.20 to 22.34) | 9.92 (2.99 to 17.35) | 6.77 (-18.61 to 34.57) | 10.53 (1.55 to 19.87) |
| Guerrero | 7.71 (-0.20 to 16.31) | 4.58 (-3.62 to 11.70) | -7.23 (-28.63 to 16.33) | -1.48 (-11.23 to 7.99) |
| Hidalgo | 16.97 (9.18 to 25.12) | 12.75 (5.20 to 20.68) | 1.70 (-19.81 to 25.28) | 10.96 (1.94 to 20.15) |
| Jalisco | 6.11 (-2.14 to 15.99) | 5.18 (-2.95 to 14.40) | -5.16 (-23.87 to 13.66) | 1.94 (-6.69 to 11.08) |
| Estado de México | 13.29 (4.49 to 23.04) | 12.16 (3.82 to 21.33) | 5.61 (-13.61 to 27.75) | 9.29 (-0.19 to 18.90) |
| Mexico City | 4.12 (-3.41 to 11.61) | 1.17 (-6.03 to 8.90) | -3.38 (-21.95 to 18.61) | 0.87 (-6.88 to 8.94) |
| Michoacán | 9.23 (2.65 to 16.35) | 6.60 (-1.22 to 13.75) | -4.19 (-25.68 to 18.09) | 2.23 (-6.05 to 10.50) |
| Morelos | 5.31 (-1.70 to 12.75) | 4.91 (-1.70 to 12.16) | 12.19 (-12.26 to 39.10) | 4.44 (-3.48 to 12.69) |
| Nayarit | 16.75 (9.67 to 23.94) | 15.07 (7.40 to 21.95) | 7.57 (-17.65 to 35.47) | 12.80 (3.36 to 22.51) |
| Nuevo Leon | 17.91 (9.91 to 27.60) | 14.88 (6.39 to 24.49) | 3.63 (-17.95 to 27.32) | 13.84 (4.88 to 23.76) |
| Oaxaca | 10.40 (3.13 to 18.29) | 7.44 (-0.38 to 14.93) | -3.29 (-23.83 to 18.52) | 3.44 (-5.04 to 12.37) |
| Puebla | 14.29 (6.91 to 22.40) | 10.81 (2.89 to 18.84) | 1.54 (-18.55 to 26.26) | 8.11 (-0.97 to 17.99) |
| Queretaro | 25.61 (17.55 to 34.30) | 21.71 (13.30 to 30.23) | 13.64 (-11.12 to 39.78) | 21.50 (12.66 to 31.06) |
| Quintana Roo | 36.21 (27.37 to 45.60) | 32.12 (23.45 to 40.52) | 29.93 (2.80 to 63.01) | 30.85 (20.66 to 41.69) |
| San Luis Potosi | 13.50 (6.01 to 20.95) | 9.13 (1.36 to 16.77) | 4.82 (-19.92 to 31.43) | 9.52 (0.84 to 18.02) |
| Sinaloa | 7.78 (0.76 to 15.60) | 5.20 (-2.56 to 11.82) | 10.13 (-14.46 to 37.44) | 5.62 (-3.19 to 15.26) |
| Sonora | 16.18 (8.60 to 24.47) | 11.93 (4.22 to 19.76) | -1.66 (-20.95 to 18.96) | 9.06 (-0.12 to 17.74) |
| Tabasco | 2.63 (-5.01 to 11.14) | 1.98 (-5.57 to 9.22) | 1.44 (-18.86 to 23.94) | -0.95 (-9.59 to 8.29) |
| Tamaulipas | 4.11 (-3.39 to 11.90) | 1.01 (-6.40 to 7.85) | -0.64 (-19.79 to 20.31) | 1.47 (-6.35 to 9.56) |
| Tlaxcala | 22.96 (14.19 to 32.22) | 17.96 (10.15 to 26.48) | 3.47 (-17.87 to 29.21) | 19.02 (8.89 to 28.89) |
| Veracruz | 2.58 (-3.79 to 9.05) | 0.43 (-7.01 to 7.03) | 1.27 (-18.43 to 21.72) | -2.52 (-11.15 to 6.84) |
| Yucatan | 3.12 (-3.50 to 10.46) | 2.18 (-4.50 to 9.08) | -1.97 (-21.03 to 20.79) | 1.43 (-7.03 to 9.97) |
| Zacatecas | 12.65 (5.64 to 20.45) | 9.84 (2.85 to 16.46) | -2.94 (-25.20 to 19.08) | 6.45 (-2.55 to 15.24) |

DALYs = Disability-adjusted lived years

**References**

1. Vos T, Lim SS, Abbafati C, Abbas KM, Abbasi M, Abbasifard M, et al. Global burden of 369 diseases and injuries in 204 countries and territories, 1990–2019: a systematic analysis for the Global Burden of Disease Study 2019. The Lancet. 2020;396(10258):1204-1222. doi: 10.1016/s0140-6736(20)30925-9.
